# Supplementary material for: Novel heterostructure Cu2S/Ni3S2 coral-like nanoarrays on Ni foam to enhance hydrogen evolution reaction in alkaline media
Source: Royal Society of Chemistry journal article supplement (doi:10.1039/d1ra07514d), 2021-01-01
Supplement: d1ra07514d1.pdf [file d1ra07514d1.pdf]

## Supplementary Information

# Two-step Hydrothermal Growth Heterostructure $\text{Cu}_2\text{S}$ - $\text{Ni}_3\text{S}_2$ Nanosheet Arrays on Ni Foam to Enhance Hydrogen Evolution Reaction in Alkaline Media

Yizhi Peng <sup>a</sup>, Hanwei He <sup>a\*</sup>

<sup>a</sup> Powder Metallurgy Research Institute, Central South University, Changsha, 410083, China

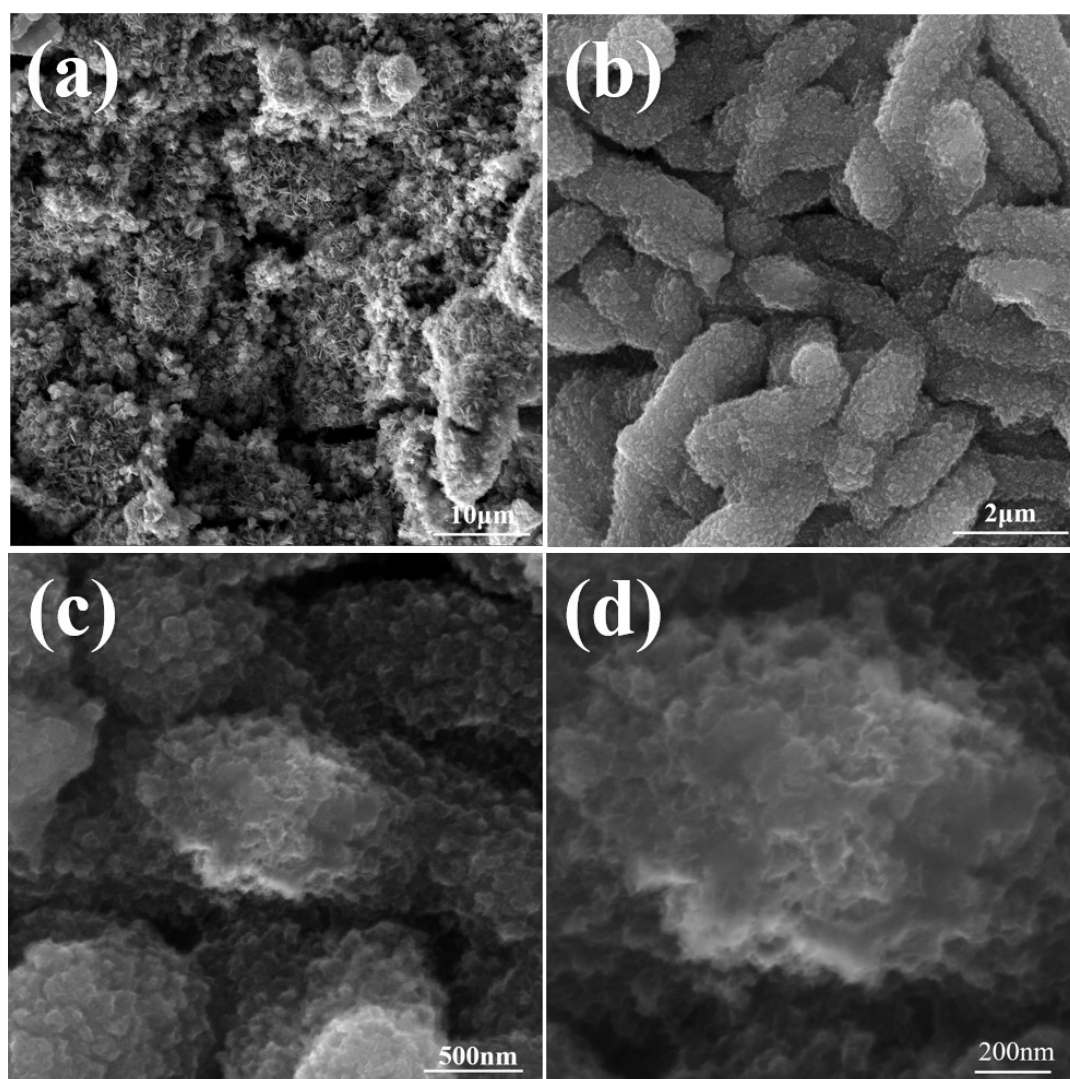

**Figure S1** (a-d) SEM image of  $\text{Cu}_2\text{S}$ - $\text{Ni}_3\text{S}_2$ /NF after 58h chronopotentiometry test

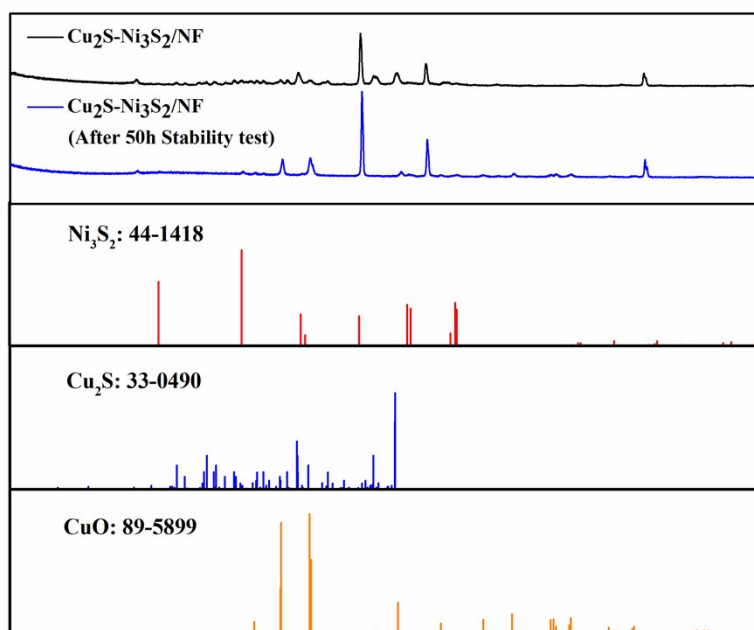

**Figure S2** XRD pattern of  $\text{Cu}_2\text{S-Ni}_3\text{S}_2/\text{NF}$  and  $\text{Cu}_2\text{S-Ni}_3\text{S}_2/\text{NF}$  after 58h chronopotentiometry test

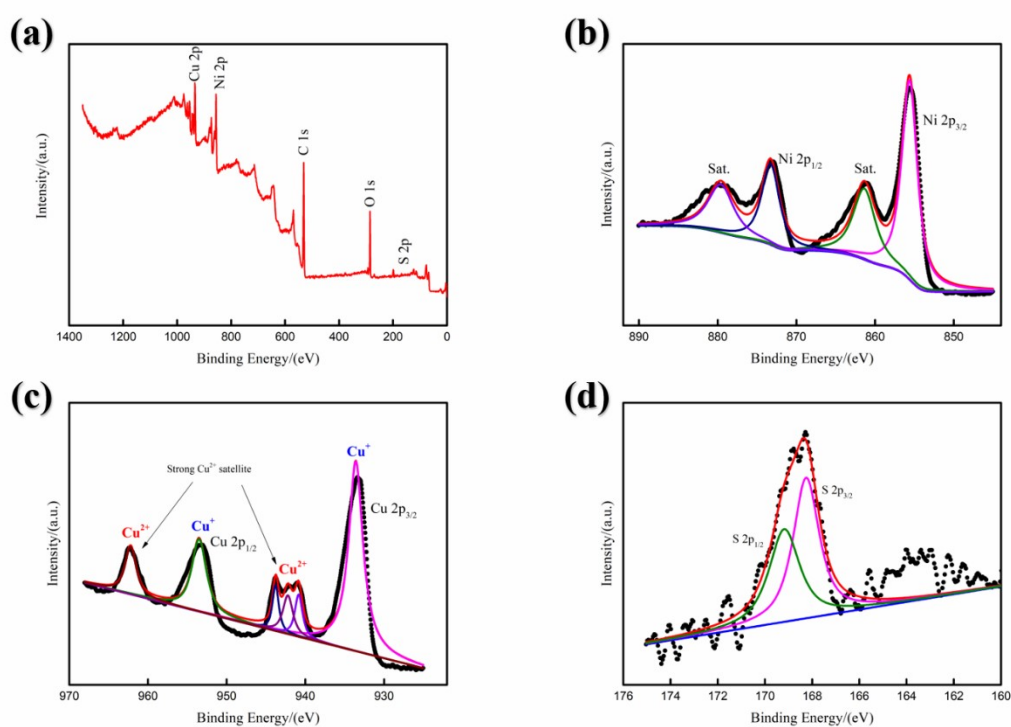

**Figure S3** (a) XPS survey spectrum for  $\text{Cu}_2\text{S-Ni}_3\text{S}_2/\text{NF}$  after 58h chronopotentiometry test. XPS spectra of  $\text{Cu}_2\text{S-Ni}_3\text{S}_2/\text{NF}$  after 58h chronopotentiometry test in the (b) Ni 2p, (c) Cu 2p and (d) S 2p regions.

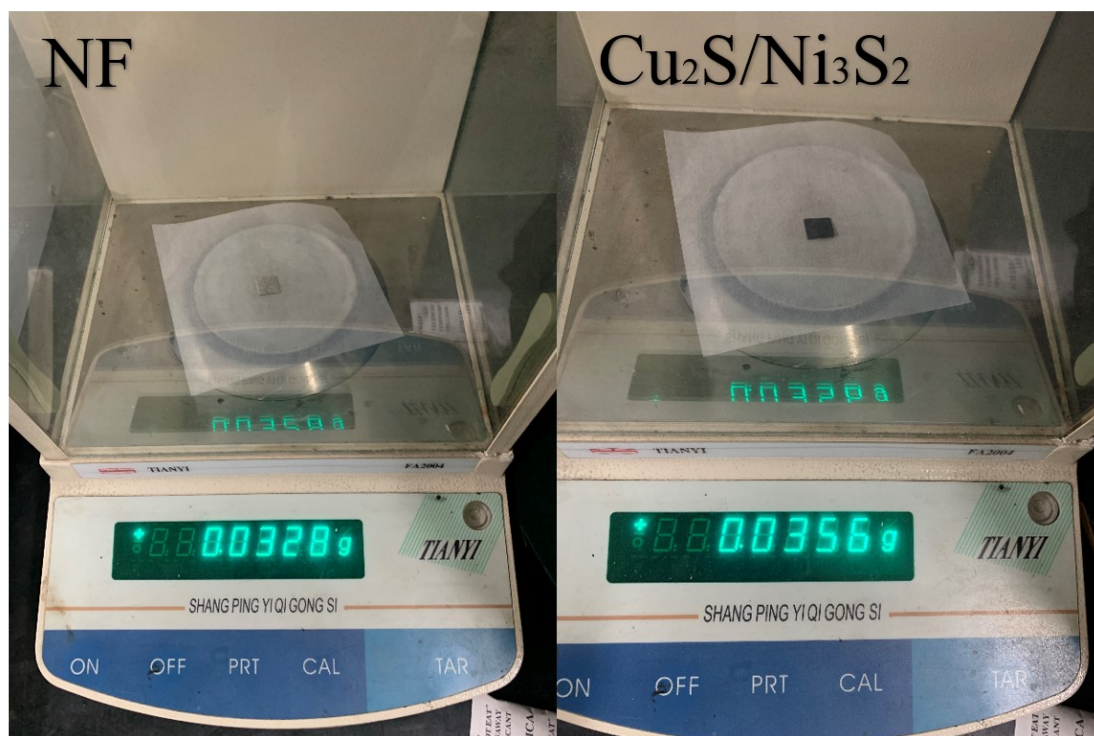

**Figure S4.** Weight comparison between NF and Cu<sub>2</sub>S-Ni<sub>3</sub>S<sub>2</sub>/NF
